## How did COVID-19 measures impact sexual behaviour and access to STI&HIV services in Panama? Results from a national cross-sectional online survey

- Amanda Gabster<sup>1,2\*</sup> <sup>1</sup>Instituto Conmemorativo Gorgas de Estudios de la Salud, Panamá  
<sup>2</sup>London School of Hygiene and Tropical Medicine, UK, Faculty of Infectious and Tropical Diseases  
agabster@gorgas.gob.pa / [Amanda.gabster@lshtm.ac.uk](mailto:Amanda.gabster@lshtm.ac.uk)
- Jennifer Toller Erausquin<sup>3</sup> <sup>3</sup>University of North Carolina Greensboro, USA, School of Health and Human Sciences, jt.erausquin@uncg.edu
- Kristien Michielsens<sup>4</sup> <sup>4</sup>Universiteit Gent, Belgium, Faculty of Medicine and Health Sciences Kristien.Michielsens@UGent.be
- Philippe Mayaud<sup>2</sup> <sup>2</sup> London School of Hygiene and Tropical Medicine, UK, Faculty of Infectious and Tropical Diseases  
philippe.mayaud@lshtm.ac.uk
- Juan Miguel Pascale<sup>1,5</sup> <sup>1</sup>Instituto Conmemorativo Gorgas de Estudios de la Salud, Panama  
<sup>3</sup> Universidad de Panamá, Facultad de Medicina  
jmpascale@gorgas.gob.pa
- Carles Pericas Escalé<sup>4,6</sup> <sup>4</sup>Universiteit Gent, Belgium, Faculty of Medicine and Health Sciences
- Michael Marks<sup>2</sup> <sup>2</sup> London School of Hygiene and Tropical Medicine, UK, Faculty of Infectious and Tropical Diseases  
Hospital for Tropical Diseases, London, UK  
michael.marks@lshtm.ac.uk
- Jennifer Katz<sup>1</sup> <sup>1</sup>Instituto Conmemorativo Gorgas de Estudios de la Salud, Panamá  
jenniferkatz26@gmail.com
- Gonzalo Cabezas Talavero<sup>1</sup> <sup>1</sup>Instituto Conmemorativo Gorgas de Estudios de la Salud, Panamá  
Gonzalo.panama.it@gmail.com
- Marilu de Argote<sup>1</sup> <sup>1</sup>Instituto Conmemorativo Gorgas de Estudios de la Salud, Panamá  
argotemac@gmail.com
- Anet Murillo<sup>1</sup> <sup>1</sup>Instituto Conmemorativo Gorgas de Estudios de la Salud, Panama  
anetmurillo@gmail.com
- Joseph D. Tucker<sup>6,2</sup> <sup>6</sup>Institute for Global Health and Infectious Diseases, University of North Carolina at Chapel Hill, Chapel Hill, NC, USA  
<sup>2</sup>London School of Hygiene and Tropical Medicine, UK, Faculty of Infectious and Tropical Diseases  
jdtucker@med.unc.edu

**Keywords:** COVID-19, sexual behaviour, virtual sex, HIV care, STI testing, Latin America  
**WC: 3000 of allowed 3000, 3 tables & 1 figure (of allowed 4), 2 supplementary tables,**

## Abstract

**Objectives** To describe changes in sexual behaviours, including virtual sex (sexting and cybersex), and access to STI&HIV testing and care during COVID-19 measures in Panama.

**Methods** We conducted an online cross-sectional survey from August 8 to September 12, 2020, among adults ( $\geq 18$  years) residing in Panama. Participants were recruited through social media. Questions included demographics, access to STI&HIV testing and HIV care and sexual behaviours three months before COVID-19 social distancing measures and during social distancing measures (COVID-19 measures). Logistic regression was used to identify associations between variables and behavioural changes.

**Results** We recruited 960 participants; 526 (54.8%) identified as cis-women, 366 (38.1%) cis-men, and 68 (7.1%) non-binary or another gender; median age was 28y (IQR:23-37y), 531/957 (55.5%) were of mixed-ethnicity (mixed-Indigenous/European/Afro-descendant ancestry). Before COVID-19 measures, virtual sex was reported by 38.5% (181/470) cis-women, 58.4% (184/315) cis-men and 45.0% (27/60) non-binary participants; during COVID-19 measures, virtual sex increased among 17.2% cis-women, 24.7% cis-men and 8.9% non-binary participants. During COVID-19 measures, 230/800 [28.8%] of participants reported decreased casual sex compared to pre-COVID-19 measures. Compared to pre-COVID-19 measures, decreased casual sex were reported more frequently during COVID-19 measures by cis-men compared to cis-women (39.2% versus 22.9%, urban/rural adjusted odds ratio [AOR]=2.17, 95% confidence interval [CI]:1.57-3.01); and by Afro-descendant compared to mixed-ethnicity participants (40.0% versus 29.8%, AOR=1.78, 95%CI:1.07-2.94). Compared to no change in virtual sex (16.8%), increase in virtual sex (38.5%, AOR=1.78, 95%CI:1.10-2.88); and decreased virtual sex (86.7%, AOR=16.53, 95%CI:7.74-35.27) were associated with decreased casual sex encounters. During COVID-19 measures, STI&HIV testing could not be obtained by 58.0% (58/100) participants who needed a test, and interrupted HIV care was reported by 53.3% (8/15) HIV-positive participants.

**Conclusions** COVID-19 measures in Panama were associated with a decrease in casual sex among cis-men and Afro-descendant peoples, whilst access to STI&HIV testing and care was seriously disrupted.

## Introduction

In early 2020, many governments around the world began implementing social distancing measures to stem the pandemic of COVID-19 (COVID-19 measures), including limits on the size of gatherings, national and international travel restrictions, and in some cases full society lockdown in order to limit human physical interactions that might drive the spread of SARS-CoV-2. In Panama, after the identification of the first case of SARS-CoV-2 on March 9, 2020, the government began to implement some of the strictest COVID-19 measures in Latin America [1, 2]. For over six months, much of the population was under strict orders including international and national travel restrictions, night-time curfew which later progressed to more severe lockdowns with 4–6-hour windows per week for permitted movement for essential goods, accompanied by social gathering crackdowns and prohibition of alcohol sale and consumption [3].

During the early phase of the COVID-19 pandemic, population-representative surveys and other sexual health research have come to a near-standstill worldwide. A small number of studies from North America and Europe have examined the impact of COVID-19 measures on sexual behaviours [4-6]. However, there is a research gap in Latin America, especially among more isolated rural and Indigenous populations. In addition, there has been little research in Latin America, and in Panama in particular, on emerging and virtual forms of sexual behaviour such as sexting (sharing or receiving nude or semi-nude photos, audio, or videos) and cybersex (participation in sexual acts in front of a camera, online and in real time).

The I-SHARE consortium was created in early 2020 in a collaborative effort by 34 participating countries to study sexual and reproductive health during COVID-19 measures worldwide [7]. In Panama, we aimed to examine the impact of COVID-19 measures on sexual behaviours and access to key sexual health services such as sexually transmitted infections (STI) and HIV (STI&HIV) testing, as well as HIV care. Since the report of new and casual partners have been globally associated with higher STI prevalence, due to decreased condom and increased access to connected sexual networks [8], we additionally analysed factors related to reported casual sex during COVID-19 measures.

## Methods

We conducted an online, cross-sectional survey from August 8 to September 12, 2020 at the end of the strictest component of the COVID-19 lockdown in Panama, (**Figure 1**). The survey was advertised on the website and other social media platforms (Facebook and Twitter) of the national public health research institute, Instituto Conmemorativo Gorgas de Estudios de la Salud (ICGES), on non-profit social-media, and through WhatsApp groups in which the investigators participate, as well as with direct messages.

### *Study design and populations*

Adults (i.e., individuals declaring to be aged  $\geq 18$  years) living in Panama were included. Convenience sampling was used, where all individuals who saw the social media posts, met the age criteria and lived in Panama were invited to participate.

### *Questionnaire creation and study procedure*

The questionnaire was developed in a collaborative effort by the I-SHARE consortium [7]. The questions were partially based on existing survey items and scales [9]. The instrument was implemented in all countries, with items phrased in similar ways but with local vocabulary allowed. The instrument in Panama was translated from the consortium English into Spanish; the questionnaire was piloted with 15 individuals for understanding and acceptability. Participants completed the questionnaire using Enketo implementation of OpenDataKit (University of Washington, USA) in 10-30 minutes. Only items associated with skip patterns were obligatory; participants did not have to answer all non-obligatory questions to complete the survey.

Key variables of interest occurring over the three months before COVID-19 measures (pre-COVID-19 measures) and during COVID-19 measures included: sexual intercourse with a casual (new or non-long-term partner), sexual intercourse with a long-term partner, virtual sex (including 'sexting' and 'cybersex') use of sexual health services such as STI&HIV testing (did COVID-19 measures stop/hinder testing access) and HIV care (asking self-declared HIV seropositive participants if HIV treatment appointments had been cancelled). Other influencing variables included: age, sex, gender, number of children, ethnic group, region of residence

(urban/rural), household and personal income, sexual orientation, general sexual satisfaction, practice of masturbation, long-term partner variables (cohabitation, tensions, emotional support, cuddling) and condom use with casual and/or long-term partners during the specified time period.

### *Statistical analyses*

We included all participants in the univariable analyses to describe demographic characteristics. The  $\chi^2$  test was used to evaluate differences by participants' sex and other influencing variables; casual sex; and sexual activity with their long-term partner three months before, and during COVID-19 measures. All participants with valid data were included; therefore, due to non-response on some questions, sample sizes varied. Key outcomes included behaviours that altered in frequency during the period COVID-19 measures were implemented.

In addition, we more closely examined factors related to decreased casual sex during COVID-19 measures. We undertook a series of three multivariable analyses comparing participants who reported the frequency of casual sex to have stayed the same over the two periods versus those who reported a decrease during COVID-19 measures, having excluded from analysis the small number of individuals who reported an increase in casual sex (n=21). The three models focused on different sets of variables: a) participant socio-demographic variables, b) individual, casual partner variables, c) long-term partners' behaviours. In these models, we first used logistic regression to calculate unadjusted bivariable Odds Ratios (OR) and their 95% confidence intervals (CI). Variables associated with the decreased casual sex outcome at  $p < 0.2$  level in bivariable analyses were included in multivariable models. As the duration of COVID-19 measures differed between urban and rural regions, we adjusted for residence (urban/rural) in the multivariable analyses. Variables independently associated with decreased casual sex at  $p < 0.1$  were included in the final model to provide adjusted (for participant gender and urban/rural residence ORs (AORs) and 95% CIs. Associations with  $p < 0.05$  were considered statistically significant.

### *Ethical considerations*

We obtained ethical approval from the Comité Nacional de Bioética de Panama (EC-CNBI-2020-06-73), Ghent University (BC-07988) and the University of North Carolina at Chapel Hill for secondary data analysis. Only participants who gave online informed consent by ticking a box could participate. There was no monetary incentive provided to participants.

## Results

In total, participants from 11 out of 12 Panamanian provinces responded to the survey. The provincial distribution was roughly similar to the 2020 census projection [10] (**Supplementary Table 1**). Of 960 participants who completed the online questionnaire, 526 (54.8%) identified as cis-women, 366 (38.1%) cis-men and 68 (7.1%) non-binary or of another gender. The median age was 28 years (interquartile range [IQR]: 23-37y). Mixed ethnicity (mixed Indigenous/European/Afro-descendant ancestry) was reported by 55.5% (531/957), Afro-descendent 10.6% (101/957), White 22.2% (212/531), Asian 1.7% (16/957) and Indigenous 10.1% (97/957). Overall, 72.4% (679/938) identified as heterosexual, 7.8% (73/938) as bisexual, 9.6% (90/938) as gay or lesbian, and 10.2% (96/938) as asexual, pansexual, queer, questioning or another orientation (**Table 1**).

The most commonly selected monthly household income category by 29.5% (273/926) of participants was <US \$500; over half (50.7%, 483/953) of participants reported to have suffered a reduced household income during the COVID-19 measures (**Table 1**).

### *Sexual behaviours*

Previous sexual experience was reported by 852/960 (88.8%) of participants. Before COVID-19 measures, casual sex among sexually experienced participants were reported by 85/466 (18.2%) of cis-women, 101/312 (32.4%) of cis-men and 14/59 (23.7%) of non-binary participants (**Table 2, Panel A**). Of those who reported casual sex, always using a condom in such encounters was reported by 43/85 (50.6%) of cis-women, 63/103 (61.2%) cis-men and 7/13 (53.9%) non-binary participants (**Supplementary Table 2**). Of all participants, compared to before COVID-19 measures, during COVID-19 measures 68.6% (549/800) of respondents reported no change,

28.8% (230/800) reported a decrease, and 2.6% (21/800) reported an increase in casual sex (**Table 2, Panel A**).

Of participants with a long-term partner, sex with the long-term partner and casual sex encounter at least monthly before COVID-19 measures was reported by 18.2% (80/440) of cis-women, 33.5% (93/278) cis-men, and 25.5% (14/55) non-binary participants.

Overall, before COVID-19 measures, 47.1% (394/837) of participants reported being sexually satisfied (**Supplementary Table 2**). Of participants reported not being satisfied before COVID-19 measures, 33.9% (150/442) reported increased satisfaction during COVID-19. During COVID-19 measures, 21.6% (105/486) reported an increase in sexual problems and 49.4% (240/486) reported a decrease in sexual problems **Table 2**.

Before COVID-19 measures, pornography use was reported by 59.2% (276/466) of cis-women, 89.5% (280/316) cis-men and 63.3% (38/60) of non-binary participants (**Supplementary Table 2**). During COVID-19 measures, pornography use was reported to have increased for 13.1% (58/442) of cis-women, 37.9% (116/306) cis-men and 10.7% (6/56) non-binary participants; and decreased for 17.7% (78/442) of cis-women, 17.0% (52/306) cis-men and 19.6% (11/56) non-binary participants (**Table 2, Panel A**).

Before COVID-19 measures, 46.4% (392/845) participants reported using virtual sex at least once a month, including sexting 44.1% (369/837) and cybersex 20.4% (172/842). Use of virtual sex had increased during COVID-19 measures for 19.9% (159/800) participants, decreased for 11.8% (94/800), and remained unchanged for 68.4% (547/800) (**Table 2, Panel A**).

#### *Long-term partner relationship and sexual behaviours*

Overall, 66.4% (637/960) participants reported having a long-term relationship before COVID-19 measures; 504 (79.1%) of whom reported to still be in their long-term relationship during COVID-19 measures. Sexual intercourse at least monthly with their long-term partner was reported by 92.7% (332/358) cis-women, 82.5% (160/194) cis-men and 90.9% (40/44) non-binary participants. Similar decreases in sex with their long-term partner during COVID-19



measures was reported by 50.2% (153/305) cis-women, 52.2% (82/157) cis-men, and 48.3% (14/29) non-binary participants (**Table 2, Panel B**).

### *Access to STI&HIV testing and HIV care services*

Overall, 45.6% (58/823) participants reported that condoms were more difficult to find during COVID-19 measures.

Of the 10.4% (100/960) who reported they needed an STI or HIV test, 58.0% (58/100) reported they could not receive it due to the COVID-19 measures.

Few (15/960, 1.6%) participants reported to be living with HIV, 8 of whom reported to have had an HIV care appointment cancelled or postponed due to COVID-19 measures. All 15 expressed to be ‘somewhat’ or ‘very worried’ about ART shortages during COVID-19 measures.

### *Factors related to decreased casual sex during COVID-19*

#### *Participants characteristics*

After adjusting for urban/rural residence, cis-men were more likely to report decreases in casual sex during COVID-19 measures (39.2%) compared to cis-women (22.9%) (AOR=2.16, 95% CI:1.58-2.95) (**Table 3, Panel A**).

After adjusting for participant gender and urban/rural residence, several factors were associated with decreased casual sex during COVID-19 measures. Individuals of Afro-descendant ethnicity reported a larger decrease in sex with casual partners (40.0% compared to 29.8% among mixed ethnicity, AOR=1.78, 95% CI:1.07-2.94). There was weak association between sex orientation and decreased sex with casual partners (43.2% among gay or lesbian participants versus 26.5% of heterosexual participants, AOR=1.66, 95% CI:0.88-3.14); (**Table 3, Panel B**).

Participants who reported the same or increased levels of alcohol use during COVID-19 measures were less likely to report decreased casual sex compared with those who decreased their alcohol use during COVID-19 measures (19.5% and 23.7% versus 40.4%, AOR=0.38, 95% CI:0.26-0.55 and AOR=0.53, 95% CI:0.32-0.85, respectively).

### *Individual sexual behaviours and virtual sex use*

After adjusting for participant gender and urban/rural residence, an increase in sexual satisfaction was associated with a decrease in casual sex: 45.3% of those reporting an increase in sexual satisfaction also reported decreased casual sex compared to 19.8% among those reporting decreased sexual satisfaction (AOR=3.34, 95%CI:2.29-4.88).

Changes in virtual sex during COVID-19 measures were also associated with decrease in casual sex. Compared to no change in virtual sex (16.8%), after adjusting for participant gender and urban/rural residence, an increase in virtual sex (38.5%) was associated with decreased casual sex (AOR=1.78, 95%CI:1.10-2.88) and decreased virtual sex (86.7%, AOR=16.53, 95%CI:7.74-35.27) were associated with decreased casual sex.

### *Long-term partner behaviours*

In unadjusted analyses, we found reduced odds of decreased casual sex among participants who cohabitated with their long-term partner compared to those whose partner lived elsewhere (13.9% versus 30.8%, OR=0.36, 95%CI:0.23-0.57), this association was not found in adjusted analyses (**Table 3, Panel C**).

## **Discussion**

This online survey has examined changes in sexual behaviours, use of virtual sex, and access to STI&HIV testing and HIV care during the implementation of COVID-19 measures in Panama. Participants were wide ranging and drew from 11 of the 12 provinces of Panama, including urban and rural dwellers as well as Indigenous participants from special Comarcas of the country. Our results expand on the literature about sexual behaviours during COVID-19 measures in Latin America. We found that overall sexual activity may have decreased, including within long-term partnerships. In particular casual sex, widely practised by 18.2% of cis-women, 32.4% cis-men and 43.0% gay/bisexual participants pre-COVID, decreased for 22.9% of cis-women, 39.1% of cis-men and 41.2% of gay/bisexual. On the other hand, virtual sex, also widely

practised by 20 to 40% of respondents pre-COVID-19, increased by 20% overall during the COVID-19 measures. Finally, we found that COVID-19 measures in Panama significantly interrupted access to condoms, STI&HIV testing and, worryingly, to HIV care for those who needed the services.

We observed an overall decrease in sexual activity during COVID-19 measures in Panama. Half of the participants reported decreased sex with a long-term partner. This may have been due to extended periods together and increased time with children or other housemates [4, 11]. Sex with a casual partner decreased among more than one-quarter of individuals. Sex with casual partners has also shown to have decreased in the United States and Australia early in the pandemic [4, 6, 12]. A decrease in casual sex partners may provide a unique opportunity HIV and other STI control programs.

We found nearly half of our participants had engaged in virtual sex before COVID-19 measures, 20% used cybersex, and 40% used sexting once or more per month, including in very rural provinces. In general, we found a 20% increase in virtual sex use during COVID-19 measures compared before COVID-19 measures. Before COVID-19 measures, cybersex use in Sweden (32%) was found to be slightly higher than what was found in Panama [13]. Some researchers and media outlets had hypothesised that virtual sex (including sexting and cybersex) might increase substantially during COVID-19 measures in response to fewer in-person sexual encounters. However, the first analyses from North America did not find this to be the case [5, 6]. Interestingly, we found that participants who reported to have increased or decreased virtual sex use were more likely to report a decrease in casual sex compared to those who did not change their virtual sex use. Our findings indicate that virtual sex use in Panama may serve both as a substitute and a preamble to in-person sex. A pre-COVID-19 meta-analysis found positive correlations between sexting, number of sex partners and condomless sex [14].

In 2019, Panama had an estimated HIV prevalence of 0.6%, described as a concentrated epidemic among men who have sex with men (MSM) (6.9%) and transwomen (29.6%) populations [15]. Correspondingly, high STI prevalence has been found among MSM, female sex workers, and adolescents [16-19]. During COVID-19 measures, access to key services was

interrupted, with over 50% of those needing a STI or HIV testing not getting it. This is supported by an overall decrease of 71% of new HIV diagnoses reported by the Panama government during that period [20]. A study in Australia also found a substantial decrease in HIV tests during 2020 [21]. HIV testing services elsewhere, including Latin America, have been significantly interrupted during the global pandemic [22-26]. Respondents also reported disrupted access to STI and HIV prevention (condoms) and HIV care commodities. Such difficulties in accessing STI&HIV testing and care in Panama during the COVID-19 measures may have been related to limited transportation, testing facility closures or the *covidization* of health services. Panama has not licensed and does not have policies supporting HIV self-testing and STI sample self-collection, as can be found elsewhere. Therefore, our findings suggest the need for alternative patient-controlled testing approaches [27, 28] that would help maintain continuity of services during national medical crises.

Our study has several limitations. First, online questionnaires are likely to suffer selection bias as they are only able to include participants who have seen the announcement and are both motivated and able to use online tools and connect. However, our study used best practices to decrease selection bias [29]. Second, the convenience approach in sample selection limits the generalisability of findings. However, we found that our sample had a fairly similar structure to the 2020 census data in terms of ethnicity, urban/rural spread, and province of residence (**Supplementary Table 1**), except that our sample had more female participants compared to census data. This finding is common in online health surveys, especially those examining sexual and reproductive health topics [30]. Lastly, this analysis is unable to correlate behaviour with biological outcomes, therefore we do not know the impact of behaviour changes on HIV or STI rates.

Our data have implications for STI and HIV research and policy. From a research perspective, our data suggest the need and usefulness of more rigorous behavioural research during national medical crises and pandemics that have the capacity to disturb normal services. While we were able to recruit a convenience sample during the pandemic, national panels or other methods can be used to obtain less biased observations [29]. These data will be important as lockdown conditions are relaxed and reinforced. From a policy perspective, our data underline the

importance of maintaining the continuity of STI&HIV testing and care services even during emergency responses.

## **Conclusions**

Our findings add to the sexual behaviour literature in Panama, particularly around the use of modern technology in the sexual dictionary of Panamanians. The study has contributed novel data about the sexual behaviours during the extreme lockdown measures that occurred during the COVID-19 pandemic in Panama. We found a decrease in sexual activity among both casual and long-term partners, paralleled with a rise in the use of virtual sex. This may have had an effect on the HIV and STI epidemics in the country, which should be measured through surveillance. Worryingly, STI and HIV prevention and care services were significantly disrupted during COVID-19 measures, indicating the lack of resilience of existing facility-based services, which calls for the offer of patient self-testing services.

## **Acknowledgements**

We are thankful to all the participants of this study, and to all who shared the study links on social media. JMP is a distinguished member of the National Research System that is supported by the National Secretariat of Science, Technology and Innovation. This study was conducted under the umbrella of the I-SHARE study (International Sexual Health and REproductive Health), which examines the impact of the COVID-19 crisis on sexual and reproductive health in diverse low-income, middle-income, and high-income countries. The full list of consortium members and their roles can be found here (<https://ishare.web.unc.edu>).

Funding: funding was not obtained for this study.

## **Key Messages:**

- During Panama's COVID-19 social distancing measures, we found a decrease in sexual activity, especially casual sex encounters among cis-men and participants of Afro-descendent ethnicity
- Virtual sex (sexting and cybersex) use was common before COVID-19 social distancing measures. Changes in this practice were associated with a decrease in casual sex.
- Condom access, STI and HIV testing, and HIV care were seriously interrupted during COVID-19 social distancing measures in Panama.

Contributorship statement:

Authors AG, JTE, KM, CPE, MM, JK, GCT, MdA, AM and JT contributed to the conception of the international and national versions of the I-SHARE project and survey instrument. Data collection was performed by AG, JK, GCT, MdA, AM and JMP. Data curation and analysis was performed by AG, JTE, JT, PM. AG drafted the manuscript, all authors contributed to critical revisions and final approval. AG is responsible for the overall content as a guarantor.

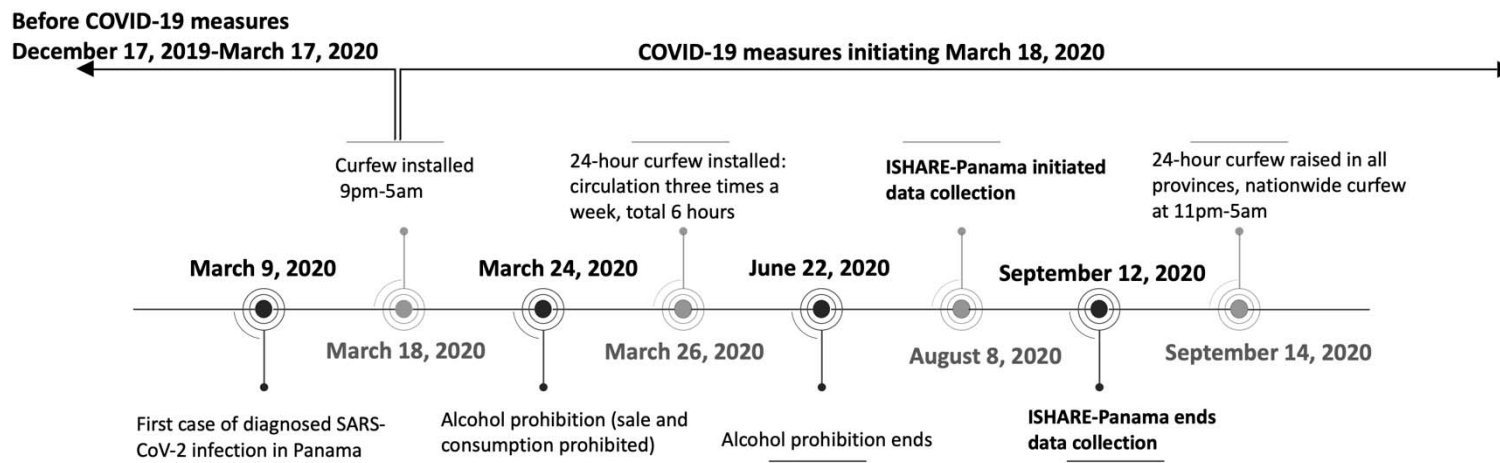

**Figure 1: Timeline of before COVID-19 social distancing measures and COVID-19 social distancing measures in Panama**

**Table 1 Socio-demographic characteristics of the study population, Panama, 2020**

|                                                                    |                                                               | N     | %    |
|--------------------------------------------------------------------|---------------------------------------------------------------|-------|------|
| <b>Sex</b>                                                         |                                                               | N=960 |      |
|                                                                    | Female                                                        | 563   | 58.6 |
|                                                                    | Male                                                          | 397   | 41.4 |
| <b>Gender</b>                                                      |                                                               | N=960 |      |
|                                                                    | Cis-Woman                                                     | 526   | 54.8 |
|                                                                    | Cis-Man                                                       | 366   | 38.1 |
|                                                                    | Non-binary/another gender                                     | 68    | 7.1  |
| <b>Age</b>                                                         | median (28, IQR:23-37)                                        | N=960 |      |
|                                                                    | 18-23                                                         | 280   | 29.2 |
|                                                                    | 24-28                                                         | 205   | 21.4 |
|                                                                    | 29-37                                                         | 246   | 25.6 |
|                                                                    | 38 and above                                                  | 229   | 23.8 |
| <b>Place of residence</b>                                          |                                                               | N=958 |      |
|                                                                    | Capital City, large or medium city                            | 656   | 68.5 |
|                                                                    | Rural town, community or Comarcas town                        | 302   | 31.5 |
| <b>Number of children</b>                                          | Median (0, IQR: 0-1)                                          | N=960 |      |
|                                                                    | 0                                                             | 641   | 66.8 |
|                                                                    | 1-2                                                           | 250   | 26.0 |
|                                                                    | 3 and more                                                    | 69    | 7.2  |
| <b>Highest completed level of education</b>                        |                                                               | N=957 |      |
|                                                                    | Secondary or less                                             | 127   | 13.3 |
|                                                                    | Some university                                               | 289   | 30.2 |
|                                                                    | Post-secondary (university completed)                         | 541   | 56.5 |
| <b>Ethnic group</b>                                                |                                                               | N=957 |      |
|                                                                    | Mixed*                                                        | 531   | 55.5 |
|                                                                    | Afro-descendent                                               | 101   | 10.6 |
|                                                                    | White                                                         | 212   | 22.2 |
|                                                                    | Asian                                                         | 16    | 1.7  |
|                                                                    | Indigenous                                                    | 97    | 10.1 |
| <b>Successful following of COVID-19 measures</b>                   |                                                               | N=957 |      |
|                                                                    | Not at all or only some                                       | 75    | 7.8  |
|                                                                    | Mostly or strictly follow them                                | 882   | 92.2 |
| <b>Have you been in strict confinement due to COVID-19</b>         |                                                               | N=955 |      |
|                                                                    | No                                                            | 817   | 85.5 |
|                                                                    | Yes                                                           | 138   | 14.5 |
| <b>SARS-CoV-2 test</b>                                             |                                                               | N=956 |      |
|                                                                    | Never                                                         | 775   | 81.1 |
|                                                                    | Yes, and positive at least once                               | 26    | 2.7  |
|                                                                    | Yes, and always been negative                                 | 155   | 16.2 |
| <b>Including yourself, how many people do you live with</b>        | median 3 people (IQR2-4)                                      | N=943 |      |
|                                                                    | 0                                                             | 33    | 3.5  |
|                                                                    | 1                                                             | 118   | 12.5 |
|                                                                    | 2                                                             | 233   | 24.7 |
|                                                                    | 3 to 4                                                        | 439   | 46.6 |
|                                                                    | 5 or more                                                     | 120   | 12.7 |
| <b>Change in employment</b>                                        |                                                               | N=935 |      |
|                                                                    | No change in what I do or going to work                       | 183   | 19.6 |
|                                                                    | Work from home part-time or fulltime                          | 448   | 47.9 |
|                                                                    | lost work or without work before and during COVID-19 measures | 304   | 32.5 |
| <b>Household income since COVID started</b>                        |                                                               | N=926 |      |
|                                                                    | US\$0 a \$499 monthly                                         | 273   | 29.5 |
|                                                                    | US\$500 a \$999 monthly                                       | 176   | 19.0 |
|                                                                    | US\$1000 a \$2000 monthly                                     | 206   | 22.3 |
|                                                                    | US\$2001-\$5000 monthly                                       | 195   | 21.1 |
|                                                                    | US\$5001 and higher monthly                                   | 76    | 8.2  |
| <b>Changes in household economic situation since COVID started</b> |                                                               | N=953 |      |
|                                                                    | Household economics got worse                                 | 483   | 50.7 |
|                                                                    | No changes in household economics                             | 445   | 46.7 |
|                                                                    | Household economics got better                                | 25    | 2.6  |
| <b>Weekly Alcohol use during COVID-19 social distancing</b>        |                                                               | N=932 |      |
|                                                                    | Decreased                                                     | 427   | 45.8 |
|                                                                    | The same                                                      | 349   | 37.4 |



|                           |                                                               |       |      |
|---------------------------|---------------------------------------------------------------|-------|------|
|                           | <b>Increased</b>                                              | 156   | 16.7 |
| <b>Sexual orientation</b> |                                                               | N=938 |      |
|                           | <b>Heterosexual</b>                                           | 679   | 72.4 |
|                           | <b>Bisexual</b>                                               | 73    | 7.8  |
|                           | <b>Gay or Lesbian</b>                                         | 90    | 9.6  |
|                           | <b>Asexual, pansexual, queer, questioning, another gender</b> | 96    | 10.2 |

\*mixed ethnicity is mixed Indigenous/European/Afro-descendant/Asian ancestry

**Table 2. Sexual behaviours during COVID-19 social distancing measures in Panama, Panama, 2020**

|                                                          |           | All participants |      | Cis-women |      | Cis-men |      | Non-binary/another gender |      |
|----------------------------------------------------------|-----------|------------------|------|-----------|------|---------|------|---------------------------|------|
|                                                          |           | N                | %    | N         | %    | N       | %    | N                         | %    |
| <b>Panel A: Individual and casual partner behaviours</b> |           |                  |      |           |      |         |      |                           |      |
| <b>Sexual Satisfaction</b>                               |           | N=833            |      | N=463     |      | N=311   |      | N=59                      |      |
|                                                          | Decreased | 406              | 48.7 | 243       | 52.5 | 133     | 42.8 | 30                        | 50.8 |
|                                                          | The same  | 211              | 25.3 | 115       | 24.8 | 81      | 26.1 | 15                        | 25.4 |
|                                                          | Increased | 216              | 25.9 | 105       | 22.7 | 97      | 31.9 | 14                        | 23.7 |
| <b>Sexual Problems*</b>                                  |           | N=486            |      | N=301     |      | N=156   |      | N=29                      |      |
|                                                          | Decreased | 240              | 49.4 | 140       | 46.5 | 83      | 53.2 | 17                        | 58.6 |
|                                                          | The same  | 141              | 29.0 | 89        | 29.6 | 44      | 28.2 | 8                         | 27.6 |
|                                                          | Increased | 105              | 21.6 | 72        | 23.9 | 29      | 18.6 | 4                         | 13.8 |
| <b>Masturbated</b>                                       |           | N=817            |      | N=455     |      | N=307   |      | N=55                      |      |
|                                                          | Decreased | 181              | 22.1 | 120       | 26.4 | 46      | 15.0 | 15                        | 27.3 |
|                                                          | The same  | 410              | 50.2 | 246       | 54.1 | 132     | 43.0 | 32                        | 58.2 |
|                                                          | Increased | 226              | 27.7 | 89        | 19.6 | 129     | 42.0 | 8                         | 14.6 |
| <b>Pornography use</b>                                   |           | N=804            |      | N=442     |      | N=306   |      | N=56                      |      |
|                                                          | Decreased | 141              | 17.5 | 78        | 17.7 | 52      | 17.0 | 11                        | 19.6 |
|                                                          | The same  | 483              | 60.1 | 306       | 69.2 | 138     | 45.1 | 39                        | 69.6 |
|                                                          | Increased | 180              | 22.4 | 58        | 13.1 | 116     | 37.9 | 6                         | 10.7 |
| <b>Virtual sex**</b>                                     |           | N=800            |      | N=441     |      | N=303   |      | N=56                      |      |
|                                                          | Decreased | 94               | 11.8 | 36        | 8.2  | 45      | 14.9 | 13                        | 23.2 |
|                                                          | The same  | 547              | 68.4 | 329       | 74.6 | 180     | 59.4 | 38                        | 67.9 |
|                                                          | Increased | 159              | 19.9 | 76        | 17.2 | 78      | 24.7 | 5                         | 8.9  |
| <b>Casual sex encounters</b>                             |           | N=800            |      | N=441     |      | N=304   |      | N=55                      |      |
|                                                          | Decreased | 230              | 28.8 | 99        | 22.4 | 115     | 37.8 | 16                        | 29.1 |
|                                                          | The same  | 549              | 68.6 | 333       | 75.5 | 178     | 58.5 | 38                        | 69.1 |
|                                                          | Increased | 21               | 2.6  | 9         | 2.0  | 11      | 3.6  | 1                         | 1.8  |
| <b>Condom use with a casual partner</b>                  |           | N=198            |      | N=81      |      | N=102   |      | N=15                      |      |
|                                                          | Decreased | 35               | 17.7 | 12        | 14.8 | 19      | 18.6 | 4                         | 26.7 |
|                                                          | The same  | 131              | 66.2 | 59        | 72.8 | 63      | 61.8 | 9                         | 60.0 |
|                                                          | Increased | 32               | 16.2 | 10        | 12.3 | 20      | 19.6 | 2                         | 13.3 |
| <b>Panel B: Long-term relationship behaviours</b>        |           |                  |      |           |      |         |      |                           |      |
| <b>Long-term partnership tensions***</b>                 |           | N=495            |      | N=308     |      | N=159   |      | N=28                      |      |
|                                                          | Decreased | 169              | 34.1 | 107       | 34.7 | 51      | 32.1 | 11                        | 39.3 |
|                                                          | The same  | 158              | 31.9 | 102       | 33.1 | 47      | 29.6 | 9                         | 32.1 |
|                                                          | Increased | 168              | 33.9 | 99        | 32.1 | 61      | 38.4 | 8                         | 28.6 |
| <b>Sex with a long-term partner</b>                      |           | N=491            |      | N=305     |      | N=157   |      | N=29                      |      |
|                                                          | Decreased | 249              | 50.7 | 153       | 50.2 | 82      | 52.2 | 14                        | 48.3 |
|                                                          | The same  | 178              | 36.2 | 108       | 35.4 | 61      | 38.8 | 9                         | 31.0 |
|                                                          | Increased | 64               | 13.0 | 44        | 14.4 | 14      | 8.9  | 6                         | 20.7 |
| <b>Condom use with a long-term partner</b>               |           | N=479            |      | N=298     |      | N=154   |      | N=27                      |      |
|                                                          | Decreased | 77               | 16.1 | 47        | 15.8 | 24      | 15.6 | 6                         | 22.2 |
|                                                          | The same  | 386              | 80.6 | 244       | 81.9 | 122     | 79.2 | 20                        | 74.1 |
|                                                          | Increased | 16               | 3.3  | 7         | 2.3  | 8       | 5.2  | 1                         | 3.7  |

\*Sexual problems are individual or partners issues including erectile dysfunction or inhibited desire, orgasm

\*\*virtual-sex is a composite variable of cybersex use and/or sexting use

\*\*\*Long-term partner relationship tensions **Fight with long-term partner**

**Table 3: Demographic, social and sexual factors associated with a reported decrease in casual sex partners during COVID-19 measures in Panama, 2020**

|                                                                                                                 |                                                               | Casual sex stayed the same* | Casual sex decreased | OR                                | p-value         | AOR**                             | p-value         |
|-----------------------------------------------------------------------------------------------------------------|---------------------------------------------------------------|-----------------------------|----------------------|-----------------------------------|-----------------|-----------------------------------|-----------------|
| <b>Panel A: Social and demographic factors associated with decreased sexual encounters with casual partners</b> |                                                               |                             |                      |                                   |                 |                                   |                 |
| <b>Gender</b>                                                                                                   |                                                               |                             |                      |                                   |                 |                                   |                 |
|                                                                                                                 | <b>Cis-woman</b>                                              | 333/432 (77.1)              | 99/432 (22.9)        | 1                                 |                 |                                   |                 |
|                                                                                                                 | <b>Cis-man</b>                                                | 178/293 (60.8)              | 115/293 (39.2)       | <b>2.17</b><br><b>(1.57-3.00)</b> | <b>&lt;0.01</b> | <b>2.17 (1.57-3.01)</b>           | <b>&lt;0.01</b> |
|                                                                                                                 | <b>Non-binary /Another gender</b>                             | 38/54 (29.6)                | 16/54 (29.6)         | 1.42<br><b>(0.76-2.65)</b>        | 0.28            | 1.41 (0.75-2.65)                  | 0.29            |
| <b>Age</b>                                                                                                      |                                                               |                             |                      |                                   |                 |                                   |                 |
|                                                                                                                 | <b>18-23</b>                                                  | 134/214 (62.6)              | 80/214 (37.4)        | 1                                 |                 | 1                                 |                 |
|                                                                                                                 | <b>24-28</b>                                                  | 118/166 (71.1)              | 48/166 (28.9)        | 0.68<br><b>(0.44-1.05)</b>        | 0.08            | 0.67<br><b>(0.42-1.10)</b>        | 0.10            |
|                                                                                                                 | <b>29-37</b>                                                  | 151/201 (75.1)              | 50/201 (24.9)        | <b>0.55</b><br><b>(0.36-0.87)</b> | <b>&lt;0.01</b> | 0.63<br><b>(0.38-1.04)</b>        | 0.07            |
|                                                                                                                 | <b>38 and above</b>                                           | 146/198 (73.7)              | 52/198 (26.3)        | <b>0.60</b><br><b>(0.39-0.91)</b> | <b>0.02</b>     | 0.92<br><b>(0.52-1.65)</b>        | 0.80            |
| <b>Children</b>                                                                                                 |                                                               |                             |                      |                                   |                 |                                   |                 |
|                                                                                                                 | <b>0</b>                                                      | 357/536 (66.4)              | 179/536 (33.4)       | 1                                 |                 | 1                                 |                 |
|                                                                                                                 | <b>1-2</b>                                                    | 153/198 (77.3)              | 45/198 (22.7)        | <b>0.59</b><br><b>(0.40-0.86)</b> | <b>&lt;0.01</b> | 0.68<br><b>(0.42-1.10)</b>        | 0.12            |
|                                                                                                                 | <b>3 and more</b>                                             | 39/45 (86.7)                | 6/45 (13.3)          | <b>0.31</b><br><b>(0.13-0.74)</b> | <b>&lt;0.01</b> | <b>0.23</b><br><b>(0.08-0.63)</b> | <b>0.01</b>     |
| <b>Ethnic group</b>                                                                                             |                                                               |                             |                      |                                   |                 |                                   |                 |
|                                                                                                                 | <b>Mestizo</b>                                                | 314/447 (70.2)              | 133/447 (29.8)       | 1                                 |                 | 1                                 |                 |
|                                                                                                                 | <b>Afro-descendent</b>                                        | 54/90 (60.0)                | 36/90 (40.0)         | 1.57<br><b>(0.98-2.51)</b>        | 0.06            | <b>1.78</b><br><b>(1.07-2.94)</b> | 0.02            |
|                                                                                                                 | <b>White</b>                                                  | 140/182 (76.9)              | 42/182 (23.1)        | 0.71<br><b>(0.47-1.06)</b>        | 0.09            | 0.72<br><b>(0.47-1.10)</b>        | 0.14            |
|                                                                                                                 | <b>Asian</b>                                                  | 6/11 (54.6)                 | 5/11 (45.4)          | 1.97<br><b>(0.59-6.56)</b>        | 0.27            | 2.25<br><b>(0.64-7.90)</b>        | 0.21            |
|                                                                                                                 | <b>Indigenous</b>                                             | 35/49 (71.4)                | 14/49 (28.6)         | 0.94<br><b>(0.49-1.81)</b>        | 0.86            | 0.65<br><b>(0.29-1.23)</b>        | 0.30            |
| <b>Household monthly income since COVID started</b>                                                             |                                                               |                             |                      |                                   |                 |                                   |                 |
|                                                                                                                 | <b>\$0 a \$499</b>                                            | 128/198 (64.6)              | 70/198 (35.3)        | 1                                 |                 | 1                                 |                 |
|                                                                                                                 | <b>\$500 a \$999</b>                                          | 98/138 (71.0)               | 40/138 (29.0)        | 0.75<br><b>(0.47-1.19)</b>        | 0.22            | 0.77<br><b>(0.46-1.30)</b>        | 0.33            |
|                                                                                                                 | <b>\$1000 a \$2000</b>                                        | 124/186 (66.7)              | 62/186 (33.3)        | 0.91<br><b>(0.60-1.39)</b>        | 0.68            | 1.01<br><b>(0.62-1.65)</b>        | 0.96            |
|                                                                                                                 | <b>\$2001-\$5000</b>                                          | 138/181 (76.2)              | 43/181 (23.8)        | <b>0.57</b><br><b>(0.36-0.89)</b> | <b>0.01</b>     | 0.76<br><b>(0.44-1.29)</b>        | 0.30            |
|                                                                                                                 | <b>\$5001 and higher</b>                                      | 56/69 (81.2)                | 13/69 (18.8)         | <b>0.42</b><br><b>(0.22-0.83)</b> | <b>0.01</b>     | 0.58<br><b>(0.27-1.23)</b>        | 0.15            |
| <b>Personal loss of income</b>                                                                                  |                                                               |                             |                      |                                   |                 |                                   |                 |
|                                                                                                                 | <b>Yes</b>                                                    | 91/148 (61.5)               | 57/148 (38.5)        | 1                                 |                 | 1                                 |                 |
|                                                                                                                 | <b>No change in work</b>                                      | 390/537 (72.6)              | 147/537 (27.4)       | <b>0.60</b><br><b>(0.41-0.88)</b> | <b>&lt;0.01</b> | 0.73<br><b>(0.47-1.15)</b>        | 0.18            |
|                                                                                                                 | <b>No income pre-COVID-19</b>                                 | 67/92 (72.8)                | 25/92 (27.2)         | 0.59<br><b>(0.34-1.05)</b>        | 0.07            | 0.61<br><b>(0.32-1.15)</b>        | 0.13            |
| <b>Alcohol use in the last week</b>                                                                             |                                                               |                             |                      |                                   |                 |                                   |                 |
|                                                                                                                 | <b>Decreased</b>                                              | 204/342 (59.6)              | 138/342 (40.4)       | 1                                 |                 | 1                                 |                 |
|                                                                                                                 | <b>The same</b>                                               | 243/302 (80.5)              | 59/302 (19.5)        | <b>0.36</b><br><b>(0.25-0.51)</b> | <b>&lt;0.01</b> | <b>0.38</b><br><b>(0.26-0.55)</b> | <b>&lt;0.01</b> |
|                                                                                                                 | <b>Increased</b>                                              | 100/131 (76.3)              | 31/131 (23.7)        | <b>0.46</b><br><b>(0.29-0.72)</b> | <b>&lt;0.01</b> | <b>0.53</b><br><b>(0.32-0.85)</b> | <b>0.01</b>     |
| <b>Panel B: Sexual behaviours- individual and with casual partners</b>                                          |                                                               |                             |                      |                                   |                 |                                   |                 |
| <b>Sexual orientation</b>                                                                                       |                                                               |                             |                      |                                   |                 |                                   |                 |
|                                                                                                                 | <b>Heterosexual</b>                                           | 425/578 (73.5)              | 153/578 (26.5)       | 1                                 |                 | 1                                 |                 |
|                                                                                                                 | <b>Bisexual</b>                                               | 38/60 (63.3)                | 22/60 (36.7)         | 1.61<br><b>(0.92-2.80)</b>        | 0.09            | 1.37<br><b>(0.69-1.87)</b>        | 0.41            |
|                                                                                                                 | <b>Lesbian, Gay</b>                                           | 46/81 (56.8)                | 35/81 (43.2)         | <b>2.11</b><br><b>(1.31-3.40)</b> | <b>&lt;0.01</b> | 1.58<br><b>(0.86-2.91)</b>        | 0.14            |
|                                                                                                                 | <b>Asexual, pansexual, queer, questioning, another gender</b> | 33/51 (64.7)                | 18/51 (35.3)         | 1.51<br><b>(0.83-2.77)</b>        | 0.18            | 0.93<br><b>(0.40-2.17)</b>        | 0.87            |
| <b>Sexual satisfaction</b>                                                                                      |                                                               |                             |                      |                                   |                 |                                   |                 |
|                                                                                                                 | <b>Decreased</b>                                              | 291/363 (80.2)              | 72/363 (19.8)        | 1                                 |                 | 1                                 |                 |
|                                                                                                                 | <b>The same</b>                                               | 139/204 (68.1)              | 65/204 (31.9)        | <b>1.89</b>                       | <b>&lt;0.01</b> | 1.50                              | 0.10            |

|                                                                      |                                      |                |               |                            |                 |                              |                 |
|----------------------------------------------------------------------|--------------------------------------|----------------|---------------|----------------------------|-----------------|------------------------------|-----------------|
|                                                                      |                                      |                |               | (1.28-2.80)                |                 | (0.91-2.47)                  |                 |
|                                                                      | <b>Increased</b>                     | 110/201 (54.7) | 91/201 (45.3) | <b>3.34</b><br>(2.29-4.88) | <0.01           | <b>2.99</b><br>(1.85-4.84)   | <b>&lt;0.01</b> |
| <b>Masturbated</b>                                                   |                                      |                |               |                            |                 |                              |                 |
|                                                                      | <b>Decreased</b>                     | 86/171 (50.3)  | 85/171 (49.7) | 1                          |                 | 1                            |                 |
|                                                                      | <b>The same</b>                      | 330/386 (85.5) | 56/386 (14.5) | <b>0.17 (0.11-0.26)</b>    | <b>&lt;0.01</b> | <b>0.34</b><br>(0.20-0.58)   | <b>&lt;0.01</b> |
|                                                                      | <b>Increased</b>                     | 130/216 (60.2) | 86/216 (39.8) | <b>0.67 (0.45-1.00)</b>    | <b>0.05</b>     | 0.77<br>(0.41-1.44)          | 0.17            |
| <b>Virtual-sex use***</b>                                            |                                      |                |               |                            |                 |                              |                 |
|                                                                      | <b>Decreased</b>                     | 12/90 (13.3)   | 78/90 (86.7)  | 32.2<br>(16.8-61.6)        |                 | <b>16.53</b><br>(7.74-35.27) |                 |
|                                                                      | <b>The same</b>                      | 446/536 (83.2) | 90/536 (16.8) | 1                          |                 | 1                            |                 |
|                                                                      | <b>Increased</b>                     | 91/148 (61.5)  | 57/148 (38.5) | <b>3.10</b><br>(2.08-4.64) |                 | <b>1.78 (1.10-2.88)</b>      |                 |
| <b>Pornography use</b>                                               |                                      |                |               |                            |                 |                              |                 |
|                                                                      | <b>Decreased</b>                     | 51/136 (37.5)  | 85/136 (62.5) | 1                          |                 | 1                            |                 |
|                                                                      | <b>The same</b>                      | 396/469 (84.4) | 74/469 (15.6) | <b>0.11</b><br>(0.07-0.17) | <b>&lt;0.01</b> | <b>0.06</b><br>(0.03-0.13)   | <b>0.01</b>     |
|                                                                      | <b>Increased</b>                     | 100/170 (58.8) | 70/170 (41.2) | <b>0.42</b><br>(0.26-0.67) | <b>0.01</b>     | 0.52<br>(0.24-1.12)          | 0.10            |
| <b>Panel C: Long-term partner relationship and sexual behaviours</b> |                                      |                |               |                            |                 |                              |                 |
| <b>Long-term partner cohabitation</b>                                |                                      |                |               |                            |                 |                              |                 |
|                                                                      | <b>No, they lived someplace else</b> | 200/289 (69.2) | 89/289 (30.8) | 1                          |                 | 1                            |                 |
|                                                                      | <b>Yes, the whole time</b>           | 199/231 (86.1) | 32/231 (13.9) | <b>0.36</b><br>(0.23-0.57) | <0.01           | 0.61<br>(0.33-1.11)          | 0.11            |
| <b>Formal relationship tensions</b>                                  | <b>Part of the time</b>              | 25/30 (83.3)   | 5/30 (16.7)   | 0.45<br>(0.17-1.21)        | 0.11            | 0.84<br>(0.29-2.46)          | 0.75            |
|                                                                      | <b>Less tensions</b>                 | 119/146 (81.5) | 27/146 (18.5) | 1                          |                 |                              |                 |
|                                                                      | <b>Tensions about the same</b>       | 126/146 (86.3) | 20/146 (13.7) | 0.70<br>(0.37-1.31)        | 0.27            |                              |                 |
|                                                                      | <b>More tensions</b>                 | 115/144 (79.9) | 29/144 (20.1) | 1.11<br>(0.62-1.99)        | 0.72            |                              |                 |
| <b>Formal partner emotional support</b>                              |                                      |                |               |                            | 0.16            |                              |                 |
|                                                                      | <b>Decreased</b>                     | 48/65 (73.8)   | 17/65 (26.2)  | 1                          |                 |                              |                 |
|                                                                      | <b>The same</b>                      | 180/214 (84.1) | 34/214 (15.9) | 0.53<br>(0.27-1.03)        | 0.06            |                              |                 |
|                                                                      | <b>Increased</b>                     | 133/160 (83.1) | 27/160 (16.9) | 0.57<br>(0.29-1.14)        | 0.11            |                              |                 |
| <b>Formal partner hugging, kissing, cuddling</b>                     |                                      |                |               |                            |                 |                              |                 |
|                                                                      | <b>Decreased</b>                     | 160/209 (76.6) | 49/209 (23.4) | 1                          |                 | 1                            |                 |
|                                                                      | <b>The same</b>                      | 128/143 (89.5) | 15/143 (10.5) | <b>0.38</b><br>(0.21-0.71) | <0.01           | 0.62<br>(0.27-1.42)          | 0.26            |
|                                                                      | <b>Increased</b>                     | 81/100 (81.0)  | 19/100 (19.0) | 0.77<br>(0.42-1.39)        | 0.38            | 1.32<br>(0.55-3.17)          | 0.54            |
| <b>Had sex with a long-term partner</b>                              |                                      |                |               |                            |                 |                              |                 |
|                                                                      | <b>Decreased</b>                     | 180/233 (77.2) | 53/233 (22.8) | 1                          |                 | 1                            |                 |
|                                                                      | <b>The same</b>                      | 142 (87.7)     | 20/162 (12.3) | <b>0.48</b><br>(0.27-0.84) | 0.02            | 0.70<br>(0.33-1.46)          | 0.34            |
|                                                                      | <b>Increased</b>                     | 47/57 (82.5)   | 10/57 (17.5)  | 0.72<br>(0.35-1.53)        | 0.40            | 0.81<br>(0.29-2.22)          | 0.68            |

\*Reports of increased casual sex not included (N=21) \*\*Adjusted for sex and area of residence (rural vs urban); \*\*\*virtual-sex is a composite variable of cybersex use and/or sexting use; \*\*\*\*independent correlate

## References

1. Megha M. Coronavirus: They grabbed my breasts and said, 'You're not a woman'. BBC. 2020 17 May.
2. The L. COVID-19 in Latin America: a humanitarian crisis. *Lancet*. 2020;396(10261):1463.
3. Loaiza JR, Rao K, Eskildsen GA, Ortega-Barria E, Miller MJ, Gittens RA. COVID-19 pandemic in Panama: lessons of the unique risks and research opportunities for Latin America. *Rev Panam Salud Publica*. 2020;44:e86.
4. Wilson B, editor Sexuality and COVID-19. Rethinking everything; 2020; Online.
5. The Economist. Pornography is booming during the COVID-19 lockdowns. The Economist. 2020.
6. Lehmillier JJ, Garcia JR, Gesselman AN, Mark KP. Less Sex, but More Sexual Diversity: Changes in Sexual Behavior during the COVID-19 Coronavirus Pandemic. *Leisure Sciences*. 2020:1-10.
7. Michielsen K, Larrson EC, Kågesten A, Erausquin JT, Griffin S, Van de Velde S, Tucker JD. International Sexual Health And REproductive health (I-SHARE) survey during COVID-19: study protocol for online national surveys and global comparative analyses. *Sex Transm Infect*. 2020.
8. Gorbach PM, Holmes KK. Transmission of STIs/HIV at the partnership level: Beyond individual-level analyses. *Journal of Urban Health*. 2003;80(3):iii15-iii25.
9. Kpokiri EE, Wu D, Srinivas ML, et al. Using a crowdsourcing open call, hackathon and a modified Delphi method to develop a consensus statement and sexual health survey instrument. *medRxiv*. 2020:2020.10.02.20205542.
10. Instituto Nacional de Estadística y Censo. Boleín 15. Estimaciones y proyecciones de la población en la república, provincia, comarca indígena por distrito, según sexo y edad; 2010-2020 2019 [cited 2020 August]. Available from: [https://www.inec.gob.pa/publicaciones/Default3.aspx?ID\\_PUBLICACION=499&ID\\_CATEGORIA=3&ID\\_SUBCATEGORIA=10](https://www.inec.gob.pa/publicaciones/Default3.aspx?ID_PUBLICACION=499&ID_CATEGORIA=3&ID_SUBCATEGORIA=10).
11. Dewitte M, Otten C, Walker L. Making love in the time of corona — considering relationships in lockdown. *Nature Reviews Urology*. 2020;17(10):547-53.
12. Coombe J, Kong FYS, Bittleston H, Williams H, Tomnay J, Vaisey A, Malta S, Goller JL, Temple-Smith M, Bouchier L, Lau A, Chow EPF, Hocking JS. Love during lockdown: findings from an online survey examining the impact of COVID-19 on the sexual health of people living in Australia. *Sex Transm Infect*. 2020.
13. Daneback K, Cooper A, Månsson S-A. An Internet Study of Cybersex Participants. *Archives of Sexual Behavior*. 2005;34(3):321-8.
14. Kosenko K, Luurs G, Binder AR. Sexting and Sexual Behavior, 2011–2015: A Critical Review and Meta-Analysis of a Growing Literature. *Journal of Computer-Mediated Communication*. 2017;22(3):141-60.
15. Joint United Nations Programme on HIV/AIDS. Country factsheets Panama 2018 online2018 [Available from: <https://www.unaids.org/en/regionscountries/countries/panama>].
16. Hakre S, Arteaga G, Núñez AE, Bautista CT, Bolen A, Villarroel M, Peel SA, Paz-Bailey G, Scott PT, Pascale JM, Panama HIVEPIG. Prevalence of HIV and other sexually transmitted

- infections and factors associated with syphilis among female sex workers in Panama. *Sexually transmitted infections*. 2013;89(2):156-64.
17. Hakre S, Arteaga GB, Núñez AE, Arambu N, Aumakhan B, Liu M, Peel SA, Pascale JM, Scott PT. Prevalence of HIV, syphilis, and other sexually transmitted infections among MSM from three cities in Panama. *J Urban Health*. 2014;91(4):793-808.
  18. Gabster A, Mayaud P, Ortiz A, Castellero O, Castellero O, López A, Aizprua B, Pitano S, Murillo A, Pascale JM. Prevalence and risk factors of genital *Chlamydia trachomatis* among school-going adolescents in urban and Indigenous-rural regions of Panama. *Sex Transm Infect*. 2020.
  19. Gabster A, Pascale JM, Cislighi B, Francis SC, Weiss HA, Martinez A, Ortiz A, Herrera M, Herrera G, Gantes C, Quiel Y, Rios A, Campbell E, Mayaud P. High prevalence of sexually transmitted infections, and high-risk sexual behaviours among indigenous adolescents of the Comarca Ngäbe-Bugle, Panama. *Sex Transm Dis*. 2019;46(12):780-7.
  20. The challenges of involving traditional healers in HIV/AIDS care. *International Journal of STD & AIDS*. 2006;17(6):360-3.
  21. Chow EPF, Ong JJ, Denham I, Fairley CK. HIV testing and diagnoses during the COVID-19 pandemic in Melbourne, Australia. *JAIDS Journal of Acquired Immune Deficiency Syndromes*. 9000; Publish Ahead of Print.
  22. Ponticiello M, Mwanga-Amumpaire J, Tushemereirwe P, Nuwagaba G, King R, Sundararajan R. "Everything is a Mess": How COVID-19 is Impacting Engagement with HIV Testing Services in Rural Southwestern Uganda. *AIDS Behav*. 2020;24(11):3006-9.
  23. Sanchez TH, Zlotorzynska M, Rai M, Baral SD. Characterizing the Impact of COVID-19 on Men Who Have Sex with Men Across the United States in April, 2020. *AIDS Behav*. 2020;24(7):2024-32.
  24. Jiang H, Zhou Y, Tang W. Maintaining HIV care during the COVID-19 pandemic. *Lancet HIV*. 2020;7(5):e308-e9.
  25. Qiao S, Li Z, Weissman S, Li X, Olatosi B, Davis C, Mansaray AB. Disparity in HIV Service Interruption in the Outbreak of COVID-19 in South Carolina. *AIDS Behav*. 2020:1-9.
  26. United Nations Joint Programme on HIV/AIDS. II Survey on the impact of COVID-19 among PLHIV Regional Results Analysis 2020 [cited 2020 December]. Available from: <http://onusidalac.org/1/images/infographic2-survey-ENG.pdf>.
  27. Greenhalgh F, Von Lingen A, Cigan B, Barbareschi G, Amort F, Cascio M, Schneider A, Hodgson I, editors. Understanding how HIV testing has been affected by the COVID-19 response. *JOURNAL OF THE INTERNATIONAL AIDS SOCIETY*; 2020: JOHN WILEY & SONS LTD THE ATRIUM, SOUTHERN GATE, CHICHESTER PO19 8SQ, W ....
  28. Ortblad KF, Stekler JD. HIV self-testing: finding its way in the prevention tool box. *BMC Med*. 2020;18(1):373.
  29. Hlatshwako TK, Shah SJ, Kosana P, Adebayo E, Hendriks J, Larsson EC, Hensel DJ, Toller E, Marks Michael, Michielsen K, Saltis H, Francis JM, Wouters E, JD T. Online health survey research during COVID-19. *The Lancet Digital Health*. 2020.
  30. Slauson-Blevins K, Johnson KM. Doing Gender, Doing Surveys? Women's Gatekeeping and Men's Non-Participation in Multi-Actor Reproductive Surveys. *Sociological Inquiry*. 2016;86(3):427-49.
